# Supplementary material
Source: ML conference proceedings conference paper supplement (https://openreview.net/forum?id=YrmTe9A5Lf)
Supplement: supplementary_material [file Supplementary_Material_ACML.pdf › Supplementary_Material_ACML.pdf]

# Supplementary Material for Graph-Attention Network with Adversarial Domain Alignment for Robust Cross-Domain Facial Expression Recognition

Editors: Hung-yi Lee and Tongliang Liu

## Appendix A. Additional Confusion Matrices

This appendix provides additional confusion matrices that detail the classification performance of ResNet-18 and ResNet-50 across different cross-domain scenarios. Figure S1 presents the confusion matrices for ResNet-18 when transferring from RAF-DB to ExpW, JAFFE, and SFEW 2.0. Similarly, Figure S2 shows the results for ResNet-50 under the same transfer settings.

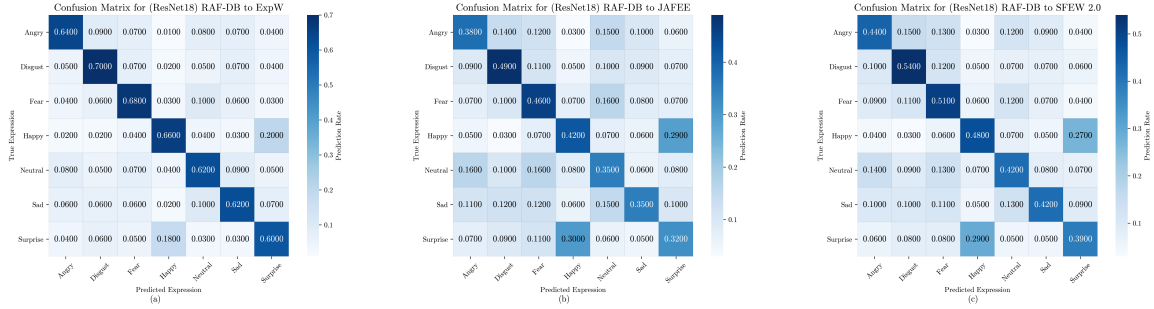

Figure S1: Confusion matrices demonstrating the classification performance of ResNet-18 from RAF-DB to (a) ExpW, (b) JAFFE, and (c) SFEW 2.0.

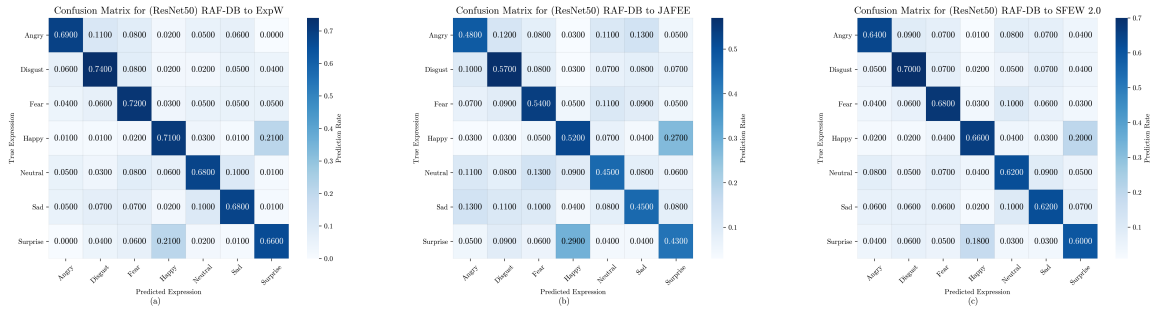

Figure S2: Confusion matrices illustrating the performance of ResNet-50 when transferring from RAF-DB to different target datasets: (a) ExpW, (b) JAFFE, and (c) SFEW 2.0.
